# Supplementary material for: A delta-tubulin/epsilon-tubulin/Ted protein complex is required for centriole architecture
Source: eLife. 2025 Mar 11;13:RP98704. doi: 10.7554/eLife.98704 (PMC11896610; doi:10.7554/eLife.98704)
Supplement: Figure 1—source data 1. [file elife-98704-fig1-data1.xlsx]

## Sheet: Description
Raw data for Fig 1B, 1C, and 1D
Fig 1B: number of cells with 0, 1, 2, 3-4, or 5+ centrioles in each cell cycle stage over 3 replicates
Fig 1C: number of centrioles with and without SASS6 staining
Fig 1D: number of centrioles with and without CEP164 staining

## Sheet: Fig 1B
Asynchronous
	0 centrioles			1 centriole			2 centrioles			3-4 centrioles			5+ centrioles
	Replicate 1	Replicate 2	Replicate 3	Replicate 1	Replicate 2	Replicate 3	Replicate 1	Replicate 2	Replicate 3	Replicate 1	Replicate 2	Replicate 3	Replicate 1	Replicate 2	Replicate 3
Control	0	0	0	0	0	0	54	53	49	42	47	45	4	0	6
TEDC1-/-	57	72	58	0	4	1	2	3	2	1	2	2	40	19	37
TEDC1 Rescued	0	0	0	0	0	0	57	53	58	40	45	40	5	2	2
TEDC2-/-	58	59	69	1	1	2	4	0	0	3	1	1	34	39	28
TEDC2 Rescued	0	0	0	0	1	0	55	50	55	40	44	37	5	5	8
G0/G1
	0 centrioles			1 centriole			2 centrioles			3-4 centrioles			5+ centrioles
	Replicate 1	Replicate 2	Replicate 3	Replicate 1	Replicate 2	Replicate 3	Replicate 1	Replicate 2	Replicate 3	Replicate 1	Replicate 2	Replicate 3	Replicate 1	Replicate 2	Replicate 3
Control	0	0	0	0	0	0	75	90	75	21	10	18	4	0	7
TEDC1-/-	79	88	88	0	0	1	1	0	1	3	0	2	17	12	8
TEDC1 Rescued	0	0	0	0	0	0	79	92	67	8	7	17	13	1	16
TEDC2-/-	87	94	83	0	0	0	3	2	3	1	0	3	9	4	11
TEDC2 Rescued	0	0	0	0	0	0	79	92	74	16	8	20	5	0	6
S
	0 centrioles			1 centriole			2 centrioles			3-4 centrioles			5+ centrioles
	Replicate 1	Replicate 2	Replicate 3	Replicate 1	Replicate 2	Replicate 3	Replicate 1	Replicate 2	Replicate 3	Replicate 1	Replicate 2	Replicate 3	Replicate 1	Replicate 2	Replicate 3
Control	0	0	0	0	0	0	0	0	0	90	92	90	10	8	10
TEDC1-/-	2	2	4	1	0	1	3	1	3	9	12	11	85	85	81
TEDC1 Rescued	0	0	0	0	0	0	0	0	0	83	82	85	17	18	15
TEDC2-/-	0	4	3	1	0	2	4	2	2	2	6	4	93	88	89
TEDC2 Rescued	0	0	0	0	0	0	0	0	4	88	93	88	12	7	8
G2
	0 centrioles			1 centriole			2 centrioles			3-4 centrioles			5+ centrioles
	Replicate 1	Replicate 2	Replicate 3	Replicate 1	Replicate 2	Replicate 3	Replicate 1	Replicate 2	Replicate 3	Replicate 1	Replicate 2	Replicate 3	Replicate 1	Replicate 2	Replicate 3
Control	0	0	0	0	0	0	0	0	4	88	76	79	12	24	17
TEDC1-/-	5	6	23	0	0	4	0	0	11	1	5	2	94	89	60
TEDC1 Rescued	0	0	0	0	0	1	2	0	7	82	78	90	16	22	2
TEDC2-/-	5	2	27	0	0	1	0	0	3	0	1	2	95	97	67
TEDC2 Rescued	0	0	0	0	0	1	0	0	12	79	79	83	21	21	4
M
	0 centrioles			1 centriole			2 centrioles			3-4 centrioles			5+ centrioles
	Replicate 1	Replicate 2	Replicate 3	Replicate 1	Replicate 2	Replicate 3	Replicate 1	Replicate 2	Replicate 3	Replicate 1	Replicate 2	Replicate 3	Replicate 1	Replicate 2	Replicate 3
Control	0	0	0	0	0	0	0	0	0	90	92	92	10	8	8
TEDC1-/-	24	46	44	0	4	6	4	4	4	4	0	9	69	46	37
TEDC1 Rescued	0	0	0	0	0	0	0	0	0	85	98	96	15	2	4
TEDC2-/-	37	39	41	0	0	2	0	6	9	0	10	13	63	45	35
TEDC2 Rescued	0	0	0	0	0	0	2	0	0	90	90	77	8	10	23

## Sheet: Fig 1C
Replicate 1	With SAS6	Without SAS6
Control	82	118
TEDC1-/-	191	9
TEDC1 Rescued	71	129
TEDC2-/-	184	16
TEDC2 Rescued	76	124
Replicate 2	With SAS6	Without SAS6
Control	72	128
TEDC1-/-	195	5
TEDC1 Rescued	75	125
TEDC2-/-	187	13
TEDC2 Rescued	89	111
Replicate 3	With SAS6	Without SAS6
Control	73	127
TEDC1-/-	192	8
TEDC1 Rescued	71	129
TEDC2-/-	187	13
TEDC2 Rescued	64	136

## Sheet: Fig 1D
Replicate 1	With Cep164	Without Cep164
Control	73	127
TEDC1-/-	0	200
TEDC1 Rescued	82	119
TEDC2-/-	0	200
TEDC2 Rescued	73	127
Replicate 2	With Cep164	Without Cep164
Control	67	133
TEDC1-/-	0	200
TEDC1 Rescued	80	120
TEDC2-/-	0	200
TEDC2 Rescued	78	122
Replicate 3	With Cep164	Without Cep164
Control	76	124
TEDC1-/-	0	200
TEDC1 Rescued	82	118
TEDC2-/-	0	200
TEDC2 Rescued	73	127
