# Supplementary material for: A delta-tubulin/epsilon-tubulin/Ted protein complex is required for centriole architecture
Source: eLife. 2025 Mar 11;13:RP98704. doi: 10.7554/eLife.98704 (PMC11896610; doi:10.7554/eLife.98704)
Supplement: Figure 4—figure supplement 1—source data 1. [file elife-98704-fig4-figsupp1-data1.xlsx]

## Sheet: Description
Data for Figure 4 Supplement 1G
Width measurements of parental centrioles (in micron, unadjusted for the macro expansion factor), organized by the co-marker(s) the centrioles were stained with
Purpose: to demonstrate that expansion factors were approximately 4-fold on the micro scale

## Sheet: Parent Widths
4A 4B Cell cycle	POC5	WDR90	SAS6 and monoE	CEP135	STIL	CPAP and γ-tub	CEP44	CEP120	CEP295	CENT2	CP110
0.96	0.98	1.03	1.17	1.02	1.03	0.97	1.17	1.1	1.05	0.98	1.17
1.06	1.03	1.11	1.08	1.03	1.02	0.95	0.98	1.18	1.06	1.03	1.08
1.03	1.02	1	1.09	1	1.17	1.1	1.21	1.14	1.02	1.02	1.09
1	0.92	0.95	1.18	0.9	1.12	1.09	1.14	1.13	1	0.92	1.18
1.04	1.03	1.03	1.15	1.04	1.05	1.15	1.12	1.16	0.99	1.03	1.15
0.98	1.01	0.94	1.2	1	1.15	0.85	1.05	1.23	0.95	1.01	1.2
0.91	0.83	1.1	1.15	1.08	1.12	0.94	1.17	1.11	1.09	0.83	1.15
0.92	0.93	0.93	1.12	1.11	1	1.05	1.13	1.15	0.99	0.93	1.12
1	0.87	1.04	1.08	1.04	1.11	0.86	1.15	1.05	0.87	0.87	1.08
1.09	0.92	1.01	1.02	1.12	1.2	0.97	1.03	1.13	1.01	0.92	1.02
1.09	0.93	1.02	1.05	1.04	1.12	0.91	1.14	1.13	0.92	0.93	1.05
0.97	0.99	1.05	1.21	1.07	1.12	1.03	1.15	1.14	0.95	0.99	1.21
1.04	1	1.05	1.05	1.01	1.08	0.91	1.13	1.15	0.97	1	1.05
1	0.92	1	1.16	1.07	1.09	0.92	1.01	1.13	1.02	0.92	1.16
0.93	1.02	0.96	1.07	1.14	1.02	0.88	1.32	1.21	0.97	1.02	1.07
	0.94	0.97	1.1	1.17	1.07	0.87	1.09	1.03	1.06	0.94	1.1
0.98	0.85	1.02	1.22	0.97	1.02	1.08	1.18	1.13	1	0.85	1.22
1	1.07	1.06	1.14	1	1.16	0.97	1.11	1.12	1.06	1.07	1.14
1.05	1.19	0.98	1.09	0.99	1.12	0.97	1.07	1.18	0.89	1.19	1.09
0.95	0.93	1.01	0.97	1.14	1.02		1.14	1.08	1.04	0.93	0.97
1.02	0.99	1.12	1.12	0.92	0.98		1.04	1.3	1.01	0.99	1.12
0.93	1.05	1.13	0.97	1.04	1.13		0.99		0.96	1.05	0.97
0.92	1	1.12	1.02				1.05		0.95	1	1.06
1.01	1.14	0.97	1.03				1.09		1.08	1.14	1.16
0.93		1.01	1				1.05				1.03
1.04		1.14	0.9								1.14
1.02		1.17	1.04								1.2
0.91		1.12	1								1.1
1.04		1.06	1.08								1.14
0.86		1.1	1.11								1.02
0.99		1.02	1.04								1.15
		1.08	1.12								1.07
		1.01	1.04								0.97
		1.07	1.07								1.03
		1.11	1.01								1.18
		1.17	1.07								1.12
		1.17	1.14								1
		1.11	1.17								1.12
		1.02	0.97								1.09
		0.97	1								1.13
		1.06	0.99								1.03
		1.15	1.14
		1.14	0.92
		1.12	1.04
		1
		1.1
		1.17
		1.34
		1.16
		1.06
		1.28
		1.03
		1.05
		1.09
		1.14
		1.05
		1.03
		1.03
		1.15
		1.04
		1.15
		1.03
		1.14
		1.2
		1.09
		1.1
		1.14
		1.02
