# Supplementary material for: A delta-tubulin/epsilon-tubulin/Ted protein complex is required for centriole architecture
Source: eLife. 2025 Mar 11;13:RP98704. doi: 10.7554/eLife.98704 (PMC11896610; doi:10.7554/eLife.98704)
Supplement: Figure 4—figure supplement 3—source data 1. [file elife-98704-fig4-figsupp3-data1.xlsx]

## Sheet: Description
Data for Figure 4 Supplement 3.
Each sheet has the data from a particular genotype (control procentrioles, control de novo centrioles, TUBD1-/-, TUBE1-/-, TEDC1-/-, TEDC2-/-)
Within each sheet, the positions of alpha-tubulin (DM1A), acetylated-tubulin (Actub), and CEP135 are charted, adjusted to the macro-scale expansion factor for each gel (unit: nanometers)
For each protein, the "start" position marks the position where signal begins, and the "end" position marks the position where signal ends
Alpha tubulin is used as the reference for all start positions (these were set to 0).

## Sheet: ctrl-pro
DM1A Start	DM1A End	Actub Start	Actub End	Cep135 Start	Cep135 End
0	146	-10.5284	117.62	-6.8464	149.45
0	156	-8.65425	132.087	-9.76209	150.979
0	181	-18.4072	134.185	-11.6172	162.457
0	195	-19.2593	131.111	-20.0937	163.61
0	207	-26.8579	166.476	-23.3864	180.317
0	230	-9.24836	193.715	-18.3696	212.001
0	231	-11.1111	171.111	-17.037	204.444
0	239	0	160.741	-1.65635	222.047
0	247	-8.14815	186.667	-14.935	231.732
0	261	0	207.407	-6.9979	202.632
0	264	-5.39267	187.941	-18.8969	185.548
0	282	-11.2979	153.147	-4.68486	173.834
0	297	-10.3179	227.46	-27.3218	158.604
0	308	-6.66667	202.222	-11.2447	179.866
0	319	-11.533	205.504	-11.2621	172.442
0	322	-2.22222	268.148	-19.9848	178.534
0	330	-9.0262	253.196	-15.8512	156.001
0	334	-15.2704	206.211	-15.0684	201.969
0	337	-8.94153	192.54	-39.2885	122.193
0	343	-1.48148	270.37	-32.6705	145.848
0	344	0	279.259	-21.2916	192.042
0	355	0	286.667	-42.6307	126.999
0	360	-20.9681	261.995	-27.5936	324.258
0	375	0	289.63	-30.1581	165.398
0	403	-6.71278	317.732	-46.7122	162.917
0	404	-16.1002	317.233	-61.3496	194.206
0	404	0	306.667	-22.7836	237.216
0	410	-2.67078	307.7	-34.6337	227.589
0	411	-11.7312	314.195	-30.324	193.38

## Sheet: ctrl-denovo
DM1A Start	DM1A End	Actub Start	Actub End	Cep135 Start	Cep135 End
0	142.745	-19.3093	96.7692	0	124.706
0	164.706	-50.5937	74.1122	-21.4241	111.125
0	171.769	-13.3099	126.146	-14.2301	154.988
0	175.833	-2.63523	145.698	-20.844	129.989
0	184.524	-24.0042	140.962	-10.3313	175.893
0	189.02	-9.48943	148.158	-22.8241	123.058
0	190.833	-22.1579	154.509	-13.7563	124.577
0	198.333	-63.0474	107.786	-56.3919	123.608
0	203.333	-32.602	155.731	-8.99724	184.336
0	206.667	-7.75595	172.244	-10.037	170.796
0	207.059	-19.647	175.647	-11.0453	172.484
0	214.118	-58.3413	114.208	-15.9067	157.427
0	214.902	-6.13125	192.3	-15.5751	167.954
0	218.039	-2.35294	198.431	-22.1066	159.854
0	219.608	0	204.706	-39.7204	134.397
0	220	-6.51445	172.652	-31.3719	153.628
0	222.5	-15	195	-5	209.167
0	226.667	-1.86339	208.137	-40.0743	148.259
0	233.725	-4.58166	197.771	-14.1418	175.662
0	237.5	-11.3416	183.658	-2.63523	200.698
0	248.333	-14.2356	205.764	-10.8333	133.333
0	252.5	-14.1667	216.667	-26.6964	95.8036
0	258.333	-3.33333	232.5	-26.0542	223.112
0	258.824	-77.0194	142.588	-20.1316	163.398
0	262.5	-3.00463	235.329	-20.3848	106.282
0	265.833	0	261.667	-22.7558	122.244
0	270	-13.2295	211.771	-38.4838	180.683
0	271.667	-9.08843	238.412	-15.7545	102.579
0	272.157	-30.92	213.002	-28.7428	172.041
0	286.275	-36.6217	190.045	-39.6021	113.339
0	288.333	-31.3356	261.164	-48.0975	106.069
0	293.333	-8.98339	242.683	-16.1172	237.216
0	293.367	-13.2827	218.01	-24.1724	131.44
0	295.918	-16.0496	250.107	-11.8445	155.672
0	297.619	-114.111	147.793	-108.931	43.2795
0	299.167	0	273.333	-4.49862	126.335
0	300	0	254.167	-37.3332	161
0	300.392	-8.68319	248.572	-15.7732	132.462
0	313.725	-11.787	244.684	-20.4669	119.141
0	319.216	-8.76889	282.996	-20.1133	164.2
0	345.882	-2.35294	318.431	-15.8649	115.9
0	354.51	-7.76431	311.451	-21.1778	151.371

## Sheet: TUBD1-
DM1A Start	DM1A End	Actub Start	Actub End	Cep135 Start	Cep135 End
0	149.02	-12.9664	98.4062	-9.663	155.827
0	171.765	-8.09769	174.647	-18.3072	166.006
0	184.314	-20.5632	122.182	-24.3707	124.649
0	189.02	-2.82788	139.917	-34.0415	135.37
0	190.588	-25.2019	141.857	-5.3081	173.515
0	192.941	-25.1581	135.626	-10.9171	161.632
0	200	-9.45325	167.017	-21.2942	130.863
0	200	-5.58675	156.766	-80.5881	88.0394
0	205.49	-30.0201	174.686	-3.92157	192.157
0	206.274	-12.6755	150.462	-2.48022	186.539
0	207.843	-17.1164	156.217	-16.9937	166.536
0	208.627	-8.5007	131.107	-19.7368	224.185
0	210.196	-28.291	157.591	-17.619	130.616
0	221.961	-23.4544	168.702	-14.3226	188.03
0	229.02	-2.82788	170.505	-3.32241	198.246
0	231.373	-9.48943	188.942	-12.549	194.51
0	247.843	-18.8626	174.078	-14.1478	221.931
0	249.412	-20.3798	189.032	-16.6201	224.164
0	267.451	-93.5569	124.482	-6.27451	243.922
0	279.216	-17.0237	211.212	-39.0718	241.713
0	280	-25.4292	142.414	-21.3635	238.244
0	285.49	-9.92087	226.158	-23.0831	296.133
0	285.49	-10.1034	213.426	-10.3683	248.455
0	286.274	-28.0957	229.159	-14.6972	287.264
0	293.333	-10.9366	235.338	-22.9588	275.08
0	295.686	-10.6913	208.917	-14.4258	261.653
0	303.529	-36.8433	221.98	-3.92157	290.98
0	314.51	-8.49486	232.289	-11.5847	259.004
0	318.431	-2.35294	278.431	-22.7451	256.471
0	353.726	-15.1719	252.279	-13.1017	295.134
0	362.353	-14.1176	304.314	-30.7353	306.52
0	385.882	-54.1496	345.85	-54.317	360.585

## Sheet: TUBE1-
DM1A Start	DM1A End	Actub Start	Actub End	Cep135 Start	Cep135 End
0	201.915	-10.4439	194.082	-15.9231	159.012
0	205.396	-13.0548	126.197	-25.2704	145.313
0	205.396	-6.4431	118.013	-9.31959	169.967
0	218.451	-10.8271	190.217	-15.7818	207.891
0	218.451	-7.38493	178.864	-26.3879	168.564
0	230.635	-7.38493	157.106	-32.6919	214.48
0	234.987	-17.4849	171.375	-46.2857	119.075
0	238.468	-7.4896	172.667	-5.55715	208.542
0	241.95	-31.6456	207.693	-17.6341	241.722
0	242.82	-13.0548	234.987	-27.0813	210.517
0	249.782	-8.35992	213.572	-17.4574	194.031
0	254.134	-8.24381	199.763	-20.0376	186.229
0	255.004	0	191.471	-14.7504	188.035
0	255.875	-13.6712	191.725	-23.1549	200.518
0	255.875	-9.47403	204.625	-9.17668	196.219
0	265.448	0	255.004	-25.1137	199.429
0	265.448	-15.2797	191.857	-24.2667	228.997
0	266.318	-11.709	231.981	-40.918	250.64
0	268.059	-9.93404	278.142	-15.7729	238.361
0	270.67	-15.0239	220.833	-29.2059	264.963
0	278.503	-12.1726	227.166	-12.2916	209.641
0	282.855	-2.46164	227.303	-11.162	258.638
0	289.817	-6.09225	180.157	-15.0098	173.85
0	289.817	-12.3957	260.885	-3.8922	243.279
0	292.428	-3.48129	252.393	-23.5265	249.755
0	293.298	-17.5516	299.246	-15.078	256.462
0	297.65	-70.4086	190.688	-16.7212	226.099
0	303.742	-16.5903	273.227	-29.6304	256.705
0	315.057	-21.9304	210.446	-22.6679	274.112
0	324.63	-8.87558	218.279	-23.4878	248.053

## Sheet: TEDC1-
DM1A Start	DM1A End	Actub Start	Actub End	Cep135 Start	Cep135 End
0	171.662	0	128.065	-23.6797	120.734
0	194.369	-8.04407	148.735	-27.0407	147.346
0	209.809	-16.7607	135.097	-32.3681	151.101
0	215.259	-12.0718	196.303	-14.5888	196.129
0	217.984	-78.4468	124.309	-32.6484	176.253
0	234.332	-22.6493	147.117	-18.802	181.016
0	236.149	-14.9736	262.303	-22.0249	278.611
0	249.773	-17.5634	215.095	-31.881	174.295
0	250.681	-22.7883	150.605	-13.0625	209.463
0	264.305	-3.48129	214.351	-23.1854	202.973
0	265.213	-21.6212	168.172	-10.7063	267.223
0	268.846	-30.244	208.22	-33.7891	225.066
0	272.48	-19.7545	193.735	-99.152	188.768
0	280.654	-10.1064	236.501	-24.9737	222.983
0	284.287	-14.8573	202.479	-12.2398	251.157
0	295.186	-28.629	160.859	-7.57047	265.817
0	297.003	-30.503	202.5	-23.7775	277.767
0	307.902	-59.3057	113.404	-97.3936	238.665
0	311.535	-13.778	247.202	-22.0487	256.789
0	319.709	-9.95124	252.104	-26.7517	262.077
0	334.242	-10.438	259.77	-26.385	239.737
0	362.398	-2.7522	214.203	-16.6986	308.46
0	420.527	-16.4908	300.683	-22.0217	311.312

## Sheet: TEDC2-
DM1A Start	DM1A End	Actub Start	Actub End	Cep135 Start	Cep135 End
0	170.833	-42.6912	102.309	-11.6512	145.849
0	170.833	-36.1803	103.82	-14.2166	124.95
0	172.5	-35.8258	94.1742	-12.4162	141.75
0	175	-34.3166	104.017	-13.0126	145.321
0	176.667	-10	139.167	-22.6721	133.161
0	202.5	-53.904	109.429	-25.6249	137.708
0	210.833	-22.0118	133.821	-40.6051	118.562
0	211.667	-58.2965	115.037	-7.26231	208.571
0	217.5	-57.1616	127.838	-25.8473	159.153
0	235	-48.7212	138.779	-22.0226	160.477
0	239.167	-56.7067	150.793	-14.1667	196.667
0	240.833	-45.5141	143.653	-46.2724	193.728
0	255	-66.1344	142.199	-20.2056	207.294
0	259.167	-57.6041	156.563	-14.9503	224.216
0	262.5	-38.4148	148.252	-8.6543	181.346
0	263.333	-45.0992	174.067	-62.7651	174.735
0	267.5	-58.2306	178.436	-24.534	192.133
0	270	-49.502	150.498	-7.75595	233.911
0	270	-44.5741	197.926	-10.113	245.72
0	270.833	-33.1086	133.558	-33.6659	236.334
0	271.667	-65.5474	146.119	-18.6339	229.699
0	275	-44.1667	172.5	-11.2976	214.536
0	277.5	-50.5131	177.82	-19.5303	204.636
0	283.333	-54.5874	177.079	-10.8606	257.473
0	284.167	-56.0747	157.259	-40.0996	195.734
0	289.167	-98.9382	151.062	-9.54479	245.455
0	303.333	-46.1242	219.709	-25.341	218.826
0	304.167	-74.242	140.758	-30.0615	233.272
0	305	-66.364	180.303	-13.9724	264.361
0	307.5	-69.8876	148.446	-7.55922	267.441
0	308.333	-75.3182	193.015	-13.6285	281.372
0	311.667	-74.1667	152.5	-14.714	257.786
0	316.667	-55.8981	216.602	-11.4491	262.718
0	331.667	-50.6096	221.89	-28.5021	245.665
0	347.5	-85.0236	164.976	-11.0055	329.828
0	358.333	-51.0374	218.963	-31.9692	285.531
