# Supplementary material for: A delta-tubulin/epsilon-tubulin/Ted protein complex is required for centriole architecture
Source: eLife. 2025 Mar 11;13:RP98704. doi: 10.7554/eLife.98704 (PMC11896610; doi:10.7554/eLife.98704)
Supplement: Figure 4—figure supplement 4—source data 1. [file elife-98704-fig4-figsupp4-data1.xlsx]

## Sheet: Description
Data for Figure 4 Supplement 4.
Each sheet has the data from a particular genotype (control procentrioles, control de novo centrioles, TUBD1-/-, TUBE1-/-, TEDC1-/-, TEDC2-/-)
Within each sheet, the positions of alpha-tubulin (DM1A) and SASS6 are charted, adjusted to the macro-scale expansion factor for each gel (unit: nanometers)
For each protein, the "start" position marks the position where signal begins, and the "end" position marks the position where signal ends
Alpha tubulin is used as the reference for all start positions (these were set to 0).

## Sheet: ctrl-pro
DM1A Start	DM1A End	SAS6 Start	SAS6 End
0	136.296	-57.7674	80.0104
0	142.222	-37.117	118.439
0	154.815	-35.5713	131.836
0	158.519	-32.4975	105.28
0	160	-37.2704	137.544
0	178.519	-12.3465	110.616
0	180.741	0	151.111
0	186.667	-28.98	108.798
0	200.741	-39.3746	126.551
0	202.963	-65.1779	108.896
0	211.111	-38.6472	122.094
0	220	-103.098	50.976
0	221.481	-19.4448	127.963
0	222.222	-33.6025	152.323
0	225.185	-42.4255	133.13
0	228.148	-47.1604	121.728
0	234.815	-8.05221	134.911
0	238.519	-21.1581	132.175
0	239.259	-53.8191	140.255
0	248.148	-16.8915	134.22
0	251.852	-17.8412	169.566
0	265.926	-54.7734	160.041
0	267.407	-57.8027	138.494
0	287.407	-72.6209	139.972
0	291.111	-42.963	125.185
0	293.333	-3.05415	201.39
0	295.556	-23.2653	161.92
0	297.778	-53.9591	124.559
0	299.259	-82.9348	157.806
0	301.481	-35.2141	143.304
0	302.963	-9.42809	115.757
0	308.889	-21.1919	149.178
0	314.074	-27.5752	158.351
0	325.185	-23.3323	155.927
0	329.63	-54.7446	133.404
0	364.444	-25.3488	187.985
0	366.667	-17.8917	236.182
0	368.148	-7.2721	105.32
0	372.593	-58.192	227.734
0	377.037	-31.6788	173.506
0	397.037	-79.2588	120
0	407.407	-26.0229	180.644
0	408.148	-46.4114	129.144
0	416.296	-16.0067	179.549
0	416.296	-24.5091	171.787
0	435.556	-5.27637	59.1681
0	438.519	-44.2994	209.775
0	453.333	-31.1456	205.151
0	459.259	0	174.815
0	460	-43.6659	207.445
0	465.185	-66.8708	210.907
0	475.556	-28.8004	175.644
0	513.333	-26.7036	251.815

## Sheet: ctrl-denovo
DM1A Start	DM1A End	SASS6 Start	SASS6 End
0	125.49	-51.0022	63.5076
0	125.49	-14.1176	94.902
0	130.196	-52.5677	77.6284
0	142.745	-38.3538	92.6266
0	146.667	-9.22967	109.202
0	149.804	-19.4321	120.96
0	158.431	-16.6106	79.0757
0	160	-15.5538	107.78
0	168.627	-22.446	95.2011
0	174.902	-24.6579	121.224
0	185.374	-10.78	132.927
0	185.882	-9.4675	136.415
0	190.833	-20.4101	100.423
0	190.833	-11.6824	102.484
0	192.157	-30.5158	118.504
0	192.941	-41.545	58.8471
0	195.578	-43.9037	121.913
0	196.429	-8.06572	82.0703
0	196.429	-63.7925	119.881
0	200.68	-26.3605	51.8707
0	203.137	-10.1121	127.927
0	206.275	-27.5162	132.484
0	207.059	-19.2281	119.595
0	207.059	-41.3524	98.2555
0	208.627	-19.875	138.556
0	210	-54.26	121.573
0	211.765	-8.08922	133.872
0	217.5	-46.5138	110.986
0	225.098	-13.3623	134.873
0	230.588	-9.92694	128.897
0	232.157	-44.0427	102.624
0	234.167	-39.5412	129.625
0	239.216	-39.4918	125.998
0	245.833	-20.0375	109.963
0	249.167	-26.0873	145.579
0	251.765	-27.5676	122.236
0	252.549	-9.72801	97.723
0	254.118	-29.2496	100.162
0	256.667	-17.7034	186.463
0	262.5	-92.8796	79.6204
0	275.294	-11.26	116.583
0	276.078	-18.9116	192.069
0	286.667	-25.5662	71.9338
0	289.167	-10.2705	117.23

## Sheet: TUBD1-
DM1A Start	DM1A End	SAS6 Start	SAS6 End
0	157.647	-44.2643	132.991
0	161.569	-65.6142	123.405
0	162.353	-63.2193	115.604
0	173.333	-22.6603	109.104
0	174.118	-50.1614	89.4465
0	176.471	-58.8275	59.6038
0	179.608	-44.9618	94.646
0	181.961	-13.8861	142.977
0	189.02	-21.7548	113.147
0	200.784	-23.8696	163.581
0	203.137	-57.1975	99.6653
0	206.275	-14.807	153.036
0	212.549	-41.5147	103.583
0	212.549	-12.4179	182.876
0	220.392	0	154.51
0	233.725	-19.9654	191.015
0	233.725	-56.5448	122.279
0	234.51	-22.9611	150.372
0	234.51	-23.6651	182.609
0	237.647	-62.9282	115.111
0	240.784	-26.5429	163.261
0	250.98	-29.8381	194.476
0	252.549	-44.8317	210.855
0	255.686	-32.3104	137.101
0	262.745	-21.2347	125.432
0	263.529	-15.1848	196.58
0	264.314	-38.9793	221.413
0	265.098	0	219.608
0	275.294	-70.6255	245.453
0	277.647	-32.3762	176.251
0	278.431	-54.3847	206.792
0	302.745	-32.9412	210.98
0	306.667	-67.91	213.659
0	312.941	-31.6331	147.19
0	328.627	-21.1093	298.106
0	347.451	-39.9307	251.834
0	369.412	-22.3275	225.516
0	385.882	-31.0291	305.441
0	409.412	-48.7746	306.52

## Sheet: TUBE1-
DM1A Start	DM1A End	SAS6 Start	SAS6 End
0	126.197	-7.82701	118.37
0	128.808	-14.2128	114.595
0	128.808	-16.6502	112.157
0	138.381	-7.83629	130.545
0	144.473	-70.362	74.1114
0	146.214	-37.2952	108.919
0	155.788	-28.2271	127.561
0	155.788	-5.07481	150.713
0	161.01	-28.9546	132.055
0	164.491	-34.0114	130.479
0	171.453	-32.3256	139.128
0	175.805	-43.0743	132.731
0	189.73	-19.1497	170.58
0	194.082	-81.9675	112.114
0	194.082	-55.5547	138.527
0	197.563	-16.3256	181.238
0	197.563	-37.1054	160.458
0	201.915	-50.5242	151.391
0	203.655	-30.6745	172.981
0	204.526	-28.9841	175.542
0	209.748	-34.5559	175.192
0	213.229	-21.5121	191.717
0	214.97	-41.2929	173.677
0	216.71	-58.7942	157.916
0	219.321	-67.101	152.22
0	224.543	-14.3104	210.233
0	225.413	-28.4206	196.993
0	228.024	-69.9596	158.065
0	228.024	-24.7488	203.276
0	233.246	-25.3322	207.914
0	235.857	-55.4445	180.413
0	255.875	-16.6397	239.235
0	258.486	-11.8412	246.644
0	261.967	-16.105	245.862
0	262.837	-18.5277	244.31
0	264.578	-23.5707	241.007
0	268.93	-16.5526	252.377
0	275.022	-27.7246	247.297
0	283.725	-35.9207	247.804
0	288.947	-14.1267	274.82
0	288.947	-30.6364	258.31
0	310.705	-29.7661	280.939
0	322.889	-25.52	297.369
0	349.869	-117.933	231.936

## Sheet: TEDC1-
DM1A Start	DM1A End	SAS6 Start	SAS6 End
0	126.249	-29.1156	69.8853
0	158.038	-17.6871	93.1212
0	163.488	-23.3911	137.372
0	168.937	-28.4144	87.8435
0	189.827	-62.3708	100.209
0	191.644	-21.3309	121.267
0	193.46	-24.3213	70.1382
0	216.167	-30.3013	84.1402
0	221.617	-37.6982	140.322
0	222.525	-37.314	139.798
0	227.975	-19.9671	127.172
0	237.965	-43.9245	151.353
0	246.14	-11.1009	148.754
0	248.865	-11.0909	139.681
0	251.589	-37.0655	164.569
0	256.131	-75.2775	139.073
0	267.938	-27.9239	91.9671
0	268.847	-57.2282	153.489
0	284.287	-34.0452	176.672
0	285.195	-28.8731	194.56
0	285.195	-69.5075	160.284
0	286.104	-14.0175	131.305
0	286.104	-12.9075	165.113
0	286.104	-41.3084	191.207
0	310.627	-20.0936	212.422
0	322.434	-11.1398	165.972
0	324.251	-54.017	210.288
0	326.975	-29.3348	166.851
0	333.333	-11.8074	231.608
0	361.49	-14.2206	171.066
0	367.847	-38.2401	203.358
0	406.903	-46.5363	279.531
0	450.5	-7.35606	305.087
0	465.032	-52.5815	288.018

## Sheet: TEDC2-
DM1A Start	DM1A End	SAS6 Start	SAS6 End
0	155.833	-15.3759	156.291
0	182.5	-52.8089	116.358
0	187.5	-44.3582	121.475
0	188.333	-21.9281	141.405
0	188.333	-24.2556	120.744
0	195	-51.701	84.1323
0	196.667	-28.1148	114.385
0	207.5	-29.2784	133.222
0	210	-9.50146	143.832
0	217.5	-20.8852	165.781
0	217.5	-49.5736	157.926
0	225.833	-20.0713	144.929
0	235.833	-10.4416	208.725
0	237.5	-88.3333	114.167
0	241.667	-3.43592	206.564
0	243.333	-50.1697	138.997
0	255.833	-13.8709	149.462
0	258.333	-43.6269	168.873
0	265	-38.0263	209.474
0	266.667	-66.3602	174.473
0	267.5	-45.1223	139.044
0	267.5	-52.8236	179.676
0	278.333	-45.21	192.29
0	279.167	-13.5657	188.934
0	290.833	-31.7708	236.562
0	294.167	-20.1814	206.485
0	299.167	-4.24918	208.251
0	312.5	-40.0502	247.45
0	326.667	-36.9922	268.841
0	463.333	-48.3582	386.642
