# Supplementary material for: A delta-tubulin/epsilon-tubulin/Ted protein complex is required for centriole architecture
Source: eLife. 2025 Mar 11;13:RP98704. doi: 10.7554/eLife.98704 (PMC11896610; doi:10.7554/eLife.98704)
Supplement: Figure 4—figure supplement 5—source data 1. [file elife-98704-fig4-figsupp5-data1.xlsx]

## Sheet: Description
Data for Figure 4 Supplement 5.
Each sheet has the data from a particular genotype (control procentrioles, control de novo centrioles, TUBD1-/-, TUBE1-/-, TEDC1-/-, TEDC2-/-)
Within each sheet, the lengths and widths of each centriole are charted (adjusted for macro scale expansion factor; unit: nanometers)

## Sheet: ctrl-pro
Length (nm)	Width (nm)
409.63	261.481
404.444	240
360	235.556
247.407	243.704
194.815	213.333
181.481	234.815
334.074	242.222
337.037	238.519
342.963	222.222
354.815	229.63
231.111	252.593
261.481	233.333
403.704	255.556
402.963	221.481
322.222	242.963
297.037	254.074
229.63	219.259
207.407	217.778
282.222	254.074
156.296	190.37
145.926	202.222
344.444	229.63
329.63	238.519
308.148	231.852
319.259	244.444
263.704	233.333
239.259	231.852
374.815	216.296
411.111	223.704
178.519	207.407
238.519	203.704
438.519	257.037
299.259	253.333
453.333	238.519
416.296	222.963
364.444	224.444
377.037	242.963
239.259	208.889
265.926	242.222
202.963	236.296
136.296	174.074
408.148	236.296
366.667	265.926
397.037	233.333
368.148	232.593
287.407	231.111
220	208.148
221.481	221.481
329.63	262.222
325.185	253.333
234.815	199.259
222.222	204.444
460	249.63
407.407	268.148
228.148	222.222
200.741	224.444
475.556	249.63
435.556	237.037
158.519	211.111
186.667	189.63
267.407	211.852
308.889	245.926
301.481	248.889
160	246.667
297.778	237.778
416.296	243.704
154.815	231.852
459.259	245.185
251.852	200.741
225.185	223.704
295.556	236.296
302.963	248.148
293.333	234.815
372.593	242.963
180.741	223.704
142.222	234.815
291.111	239.259
314.074	233.333
248.148	231.111
211.111	233.333
465.185	249.63
513.333	249.63

## Sheet: ctrl-denovo
Length (nm)	Width (nm)
175.833	250.833
220	250
190.833	238.333
271.667	210
258.333	216.667
299.167	209.167
222.5	213.333
288.333	224.167
252.5	233.333
262.5	219.167
265.833	215.833
300	270.833
293.333	246.667
206.667	253.333
270	255
237.5	242.5
248.333	273.333
203.333	235
226.667	207.5
198.333	205
286.667	252.5
289.167	261.667
262.5	252.5
249.167	255.833
234.167	252.5
245.833	245.833
190.833	239.167
210	235.833
160	221.667
190.833	232.5
217.5	236.667
256.667	260.833
189.02	209.412
214.118	220.392
272.157	229.804
142.745	204.706
164.706	193.725
258.824	216.471
286.275	225.882
214.902	218.824
219.608	212.549
218.039	203.137
207.059	213.333
233.725	194.51
313.725	224.314
300.392	219.608
354.51	229.02
319.216	219.608
345.882	218.824
276.078	214.118
203.137	222.745
230.588	204.706
207.059	208.627
252.549	220.392
192.941	203.137
149.804	211.765
232.157	210.98
251.765	221.961
275.294	220.392
206.275	220.392
225.098	229.804
239.216	203.922
208.627	228.235
211.765	210.196
174.902	209.412
254.118	210.98
185.882	207.059
207.059	196.863
130.196	185.882
146.667	203.922
125.49	185.882
158.431	195.294
125.49	197.647
192.157	201.569
142.745	203.922
168.627	217.255
295.918	239.796
297.619	230.442
293.367	253.401
184.524	221.939
171.769	221.088
196.429	235.544
200.68	251.701
195.578	232.143
196.429	250.85
185.374	229.592

## Sheet: TUBD1-
Length (nm)	Width (nm)
303.529	225.882
286.275	214.902
205.49	189.804
149.02	188.235
208.627	193.725
280	205.49
249.412	211.765
362.353	197.647
314.51	208.627
295.686	184.314
353.725	183.529
221.961	210.196
200	215.686
207.843	214.902
192.941	171.765
385.882	224.314
229.02	216.471
247.843	207.843
171.765	171.765
190.588	215.686
293.333	184.314
184.314	225.098
189.02	221.176
200	232.941
231.373	203.137
210.196	222.745
161.569	232.941
157.647	216.471
385.882	197.647
409.412	212.549
328.627	220.392
306.667	221.176
233.725	211.765
206.275	214.118
234.51	178.824
250.98	211.765
189.02	196.078
200.784	200.784
220.392	199.216
179.608	221.176
263.529	174.118
278.431	198.431
347.451	203.137
277.647	192.157
237.647	209.412
302.745	211.765
173.333	185.098
174.118	195.294
255.686	200.784
252.549	196.078
162.353	196.078
275.294	241.569
176.471	185.098
264.314	210.98
203.137	209.412
212.549	218.039
240.784	186.667
262.745	201.569
369.412	203.922
234.51	195.294
233.725	224.314
265.098	206.275
312.941	246.275
181.961	225.882

## Sheet: TUBE1-
Length (nm)	Width (nm)
315.057	210.618
254.134	229.765
255.875	190.601
230.635	222.802
255.004	222.802
234.987	195.822
241.95	214.099
289.817	191.471
238.468	194.952
218.451	199.304
201.915	184.508
205.396	206.266
266.319	214.099
270.67	209.748
324.63	207.137
218.451	215.84
255.875	219.321
297.65	215.84
249.783	218.451
265.448	229.765
278.503	221.932
205.396	210.618
303.742	206.266
265.448	226.284
282.855	213.229
242.82	208.877
292.428	208.007
289.817	214.97
293.298	207.137
268.059	205.396
350.74	208.877
370.757	204.526
191.471	207.137
236.728	194.952
353.351	201.915
264.578	213.229
241.079	192.341
354.221	208.877
389.904	173.194
255.004	184.508
246.301	187.99
356.832	183.638
241.95	164.491
344.648	165.361
280.244	175.805
140.992	169.713
241.95	238.468
140.122	231.506
328.982	218.451
223.673	213.229
266.319	179.286
350.74	193.211
205.396	196.693
167.102	179.286
416.014	213.229
247.171	213.229
279.373	220.191
205.396	201.915
176.675	198.433
179.286	191.471
161.01	195.822
201.915	201.915
311.575	191.471
279.373	193.211
263.708	180.157
326.371	192.341
411.662	187.99
360.313	206.266
353.351	221.062
382.942	214.97
335.074	209.748
310.705	214.099
249.783	175.805
216.71	163.621

## Sheet: TEDC1-
Length (nm)	Width (nm)
265.213	239.782
362.398	226.158
194.369	181.653
171.662	203.451
215.259	200.727
217.984	208.901
272.48	228.883
307.902	219.8
297.003	200.727
319.709	215.259
234.332	207.993
250.681	217.984
264.305	192.552
334.242	216.167
209.809	216.167
280.654	205.268
236.149	195.277
420.527	179.837
284.287	219.8
268.847	215.259
311.535	216.167
286.104	201.635
285.195	207.993
333.333	207.084
251.589	223.433
326.975	218.892
286.104	206.176
267.938	213.442
285.195	200.727
324.251	228.883
268.847	221.617
163.488	201.635
246.14	207.993
221.617	178.02
219.8	165.304
191.644	207.084
317.893	277.021
495.913	214.351
450.5	254.314
367.847	240.69
302.452	237.965
271.571	229.791
583.106	195.277
222.525	223.433
237.965	246.14
286.104	211.626
323.342	224.342
214.351	222.525
345.141	209.809
227.975	203.451
193.46	185.286
199.818	181.653
256.131	225.25
322.434	232.516
284.287	255.223
248.865	221.617

## Sheet: TEDC2-
Length (nm)	Width (nm)
331.667	216.667
267.5	205
283.333	226.667
303.333	222.5
347.5	202.5
240.833	197.5
235	206.667
311.667	210
289.167	213.333
277.5	233.333
239.167	210
305	217.5
170.833	200
210.833	202.5
262.5	206.667
217.5	219.167
170.833	200
308.333	201.667
270	200
270	199.167
271.667	235.833
270.833	225
358.333	189.167
284.167	200
275	188.333
255	209.167
211.667	200.833
175	236.667
172.5	214.167
176.667	175.833
202.5	215
259.167	200.833
188.333	194.167
217.5	199.167
188.333	211.667
235.833	200
217.5	213.333
463.333	228.333
326.667	217.5
267.5	219.167
258.333	207.5
299.167	190.833
241.667	202.5
195	205.833
290.833	200.833
278.333	205
237.5	186.667
225.833	193.333
243.333	215
155.833	221.667
187.5	205
266.667	211.667
182.5	194.167
267.5	212.5
265	207.5
255.833	189.167
312.5	179.167
294.167	210
279.167	204.167
207.5	225
210	217.5
196.667	209.167
