# Supplementary material for: A delta-tubulin/epsilon-tubulin/Ted protein complex is required for centriole architecture
Source: eLife. 2025 Mar 11;13:RP98704. doi: 10.7554/eLife.98704 (PMC11896610; doi:10.7554/eLife.98704)
Supplement: Figure 4—source data 1. [file elife-98704-fig4-data1.xlsx]

## Sheet: Description
Data for Figure 4A.
Centriole lengths for S or G2 phase procentrioles, de novo centrioles, and mutant centrioles
All lengths are in nm and adjusted for a macro-scale expansion factor of 4.

## Sheet: Data
S procentrioles	G2 procentrioles	S de novo	G2 de novo	S TUBD1-/-	G2 TUBD1-/-	S TUBE1-/-	G2 TUBE1-/-	S TEDC1-/-	G2 TEDC1-/-	S TEDC2-/-	G2 TEDC2-/-
160	272.5	125	175	162.5	232.5	125	175	130	190	97.5	190
192.5	287.5	122.5	180	132.5	165	77.5	190	102.5	180	140	167.5
152.5	155	80	135	145	170	120	197.5		145	107.5	210
165	180	122.5	152.5	152.5	212.5	140	165	105	150	107.5	237.5
212.5	330	122.5	177.5	135	220	142.5	170	135	240	142.5	212.5
155	292.5	120	127.5	150	180		195	125	212.5	115	140
170	322.5		145	150	127.5	132.5	217.5	135	217.5		202.5
140	280		115	140	137.5	147.5	212.5	127.5	265	157.5	190
160	322.5		190	122.5	140	130	157.5	130	260	162.5	172.5
112.5	317.5		210	125	205	130	177.5	122.5	240	145	157.5
105	285		207.5	142.5	215	107.5	182.5	145	247.5	105	172.5
	252.5		235	132.5	157.5	95	235	110	262.5	130	202.5
100			260		160	92.5	225	120	265	135	227.5
92.5	207.5		162.5		147.5	132.5	242.5	127.5	160	157.5	215
120	247.5		202.5		162.5	107.5	262.5		150	150	242.5
147.5	212.5		227.5		152.5	105	242.5		212.5	105	157.5
105	215		112.5		320	125	240		217.5	112.5	277.5
117.5	170		102.5		367.5		252.5		250	117.5	132.5
112.5	190		140		335		305		280	125	205
127.5	257.5		240		365		295		240		177.5
	252.5		220		142.5		300		247.5		182.5
	157.5		235		127.5				267.5		152.5
							170		130		142.5
			225		182.5		227.5		102.5		155
			255		150		195		215		167.5
			245		152.5		200		180
			172.5		230		240		190		132.5
			245		307.5		230		175		167.5
			197.5		252.5		232.5		217.5		152.5
			257.5		275		247.5				135
			300		247.5		200		235		137.5
			262.5		292.5		170		212.5		127.5
			230		215		155		225		167.5
			172.5		280		250		225		335
			245		220		180		237.5		155
			280		262.5		132.5		212.5		122.5
			295		177.5				200		150
			257.5		155				160		155
			287.5		145				190		227.5
			297.5		182.5				297.5		255
					232.5				265		207.5
					205				177.5		232.5
					175				262.5		202.5
					162.5				175		197.5
					195				175		220
									137.5
